# Supplementary material
Source: Research Square preprint supplement (doi:10.21203/rs.3.rs-9923937/v1)
Supplement: Supplementary file 1 [file 3b01049d135c85f536ae9e4d.docx]

**Supplementary figure legends**

**Online Resource 1: Fig. S1 | Composition and annotation validation of the integrated ccRCC single-cell atlas**a Stacked bar plots showing major cell-type composition across samples.
b Chord diagram showing dataset contributions to major cell types.
c Dot plots of representative marker genes supporting cell-type annotation. Top, immune markers; middle, stromal markers; bottom, epithelial/tumor-related markers. Dot size indicates the proportion of expressing cells, and color indicates average expression.
d Heatmap showing cluster composition across datasets

**Online Resource 2: Fig. S2 | Expression support for key ligand-receptor axis genes in sender and receiver compartments**

a Violin plots of candidate receptor expression in low versus high-score malignant cells.

b Feature plots of TNFSF12, IL1A, TNFRSF12A, and VCAM1 across the integrated atlas.

c Dot plot of key ligand-receptor axis genes across sender and receiver compartments

**Online Resource 3: Fig. S3 | Expanded comparison of virtual perturbation responses across multiple candidate nodes**a Perturbation-response scatter plot after IL1A virtual knockout.
b Perturbation-response scatter plot after TNFRSF12A virtual knockout.
c Perturbation-response scatter plot after MAP3K14 virtual knockout.
d Perturbation-response scatter plot after VCAM1 virtual knockout.
e Integrated heatmap comparing the effects of IL1A, TNFRSF12A, MAP3K14, and VCAM1 virtual perturbations on shared inflammatory/stress output nodes

**Online Resource 4: Fig. S4 | Expanded GO/KEGG networks associated with different virtual perturbations**a GO chord network associated with IL1A virtual knockout.
b KEGG chord network associated with IL1A virtual knockout.
c GO chord network associated with MAP3K14 virtual knockout.
d KEGG chord network associated with TNFRSF12A virtual knockout.
e GO chord network associated with VCAM1 virtual knockout.
f KEGG chord network associated with VCAM1 virtual knockout
